# Supplementary material for: Amplified fragment length polymorphism and whole genome sequencing: a comparison of methods in the investigation of a nosocomial outbreak with vancomycin resistant enterococci
Source: Antimicrob Resist Infect Control. 2019 Sep 23;8:153. doi: 10.1186/s13756-019-0604-5 (PMC6757385; doi:10.1186/s13756-019-0604-5)
Supplement: Supplementary file 2 — Table S1. All available characteristics of the isolates included in either AFLP, WGS or both analysis methods. NLD = Netherlands, PRT = Portugal, GRC = Greece, DK = Denmark. Phenotypic vancomycin susceptibility testing per typed isolate by VITEK and confirmatory E-test (EUCAST clinical cut-off > 4 mg/L). *The same isolate grown on another plate had an e-test MIC of 8 mg/L. **E-test not done. Same isolate grown on another plate had an e-test MIC of 16 mg/L. Table S2. Core-SNP matrix indicating core-SNP differences between each isolate. Boxed are the core-SNP differences between the Index isolate S01 and all other isolates. (XLSX 23 kb) [file 13756_2019_604_MOESM2_ESM.xlsx]

## Sheet: Suppl table 1
Study number	country of isolation	City / Region	year of isolation	MLST	vancomycin locus	Vancomycin MIC VITEK	Vancomycin MIC Etest	ENA accession number	AFLP	WGS
H01	NLD	Amsterdam	2017	117	vanB	>16	12	SAMEA104712320	AT17101	yes
H01-duplicate	NLD	Amsterdam	2017	117	vanB			SAMEA104712321	NA	yes
H02	NLD	Amsterdam	2017	117	vanB	8	6	SAMEA104712322	AT17101	yes
S01	NLD	Amsterdam	2017	117	vanB	8	8	SAMEA104712323	AT17101	yes
S02	NLD	Amsterdam	2017	117	vanB	8	8	SAMEA104712329	AT17101	yes
S03	NLD	Amsterdam	2017	117	vanB	>16	8	SAMEA104712330	AT17101	yes
S04	NLD	Amsterdam	2017	117	NA	>16	64*	NA	AT17101	yes
S05	NLD	Amsterdam	2017	117	NA	8	ND	NA	AT17101	yes
S06	NLD	Amsterdam	2017	117	vanB	>16	12	SAMEA104712331	AT17101	yes
S07	NLD	Amsterdam	2017	117	not found	8	8	SAMEA104712332	AT17101	yes
S07-duplicate	NLD	Amsterdam	2017	117	not found		0.75	SAMEA104712333	AT17101	yes
S08	NLD	Amsterdam	2017	117	vanB	>16	6	SAMEA104712334	AT17101	yes
S09	NLD	Amsterdam	2017	117	vanB	>16	24	SAMEA104712335	AT17101	yes
S10	NLD	Amsterdam	2017	117	vanB	>16	12	SAMEA104712324	AT17101	yes
S11	NLD	Amsterdam	2017	117	vanB	8	8	SAMEA104712325	AT17101	yes
S12	NLD	Amsterdam	2017	117	vanB	8	ND**	SAMEA104712326	AT17101	yes
S13	NLD	Amsterdam	2017	117	NA	8	16	NA	AT17101	yes
S14	NLD	Amsterdam	2017	117	vanB	8	12	SAMEA104712327	AT17101	yes
S15	NLD	Amsterdam	2017	117	vanB	8	8	SAMEA104712328	AT17101	yes
S16	NLD	Amsterdam	2017	117	NA	8	8	NA	AT17101	yes
S17	NLD	Amsterdam	2017	117	NA	8	8	NA	AT17101	yes
S18	NLD	Amsterdam	2017	117	NA	8	8	NA	AT17101	yes
S19	NLD	Amsterdam	2017	117	NA	>16	6	NA	AT17101	yes
S20	NLD	Amsterdam	2017	117	NA	8	6	NA	AT17101	yes
U01	NLD	Amsterdam	2017	203	vanA	8	4	SAMEA104712336	AT17102	yes
U02-1	NLD	Amsterdam	2017	80	vanB	ND	96	SAMEA104712337	AT17106	yes
U02-2	NLD	Amsterdam	2017	925	not found	>16	64	SAMEA104712339	AT17125	yes
U03	NLD	Amsterdam	2017	80	vanB	>16	64	SAMEA104712338	AT17106	yes
U04	NLD	Amsterdam	2017	117	NA	>16	96	NA	AT17126	yes
U05	NLD	Amsterdam	2017	NA	NA	>16	>256	NA	AT17173	yes
U06	NLD	Amsterdam	2015	203	vanA	>16		SAMEA104712340	NA	yes
E3449	NLD	Amsterdam	2006	117
E6059	PRT	Porto	2010	117
E7002	LVA	Riga	2010	117
E7010	FRA	Garches	2009	203
E7205	GRC	Athens	2009	203
E7237	GRC	Athens	2010	117
E7314	NLD	Doetinchem	2012	117
E7429	NLD	Groningen	2010	117
E7486	NLD	Utrecht	2012	117
E7641	NLD	Sittard	2013	117
E7672	NLD	Sittard	2013	203
E7920	NLD	Veldhoven	2013	117
E7935	NLD	Veldhoven	2013	203
E7963	NLD	Amsterdam	2013	203
E7965	NLD	Amsterdam	2013	203
E7967	NLD	Amersfoort	2013	203
E8004	NLD	Amsterdam	2014	203
E8022	NLD	Zwolle	2014	117
E8028	NLD	Amsterdam	2014	203
E8265	NLD	Hengelo	2015	117
E8344	NLD	Dordrecht	2015	117
E8388	NLD	Utrecht	2015	203
E8402	NLD	Den Haag	2015	203
E8413	NLD	Heerlen	2015	117
E9000	NLD	Zwolle	2015	203
SRR631109	DK		2010	17	vanA
SRR631764	DK		2010	412	vanA
SRR631779	DK		2010	18	vanA
SRR633913	DK		2010	192	VanA
Supplementary table 1. All available chareristics of the isolates included in either AFLP, WGS or both analysis methods. NLD = Netherlands, DK = Denmark.
Phenotypic vancomycin susceptibility testing per typed isolate by VITEK and confirmatory E-test (EUCAST clinical cut-off >4mg/L). *The same isolate grown on another plate had an e-test MIC of 8mg/L. **E-test not done. Same isolate grown on another plate had an e-test MIC of 16mg/L.

## Sheet: Suppl table 2
	E3449	E6059	E7002	E7010	E7205	E7237	E7314	E7429	E7486	E7641	E7672	E7920	E7935	E7963	E7965	E7967	E8004	E8022	E8028	E8265	E8344	E8388	E8402	E8413	E9000	H01	H02	S01	S02	S03	S04	S05	S06	S07	S08	S09	S10	S11	S12	S13	S14	S15	S16	S17	S18	S19	S20	SRR631109	SRR631764
E3449	0
E6059	177	0
E7002	47	208	0
E7010	798	657	765	0
E7205	1055	914	1022	528	0
E7237	180	25	211	646	903	0
E7314	311	326	276	718	976	315	0
E7429	289	304	254	728	986	307	46	0
E7486	272	287	237	735	993	290	55	25	0
E7641	1528	1499	1493	1652	1925	1498	1515	1539	1538	0
E7672	924	937	891	665	245	926	761	791	802	1996	0
E7920	581	432	546	752	712	435	334	310	319	1595	815	0
E7935	1031	880	998	546	150	869	898	886	895	1919	245	584	0
E7963	924	937	891	665	245	926	761	791	802	1996	8	815	245	0
E7965	923	936	890	664	244	925	760	790	801	1995	7	814	244	1	0
E7967	924	937	891	665	245	926	761	791	802	1996	8	815	245	4	3	0
E8004	926	939	893	665	245	928	761	793	802	1996	10	815	245	6	5	2	0
E8022	287	302	252	724	982	305	40	12	21	1535	791	306	882	791	790	791	791	0
E8028	926	939	893	665	245	928	761	793	802	1996	10	815	245	6	5	2	0	791	0
E8265	579	430	544	756	712	433	336	306	315	1601	821	8	588	821	820	821	821	302	821	0
E8344	541	386	506	771	1010	375	468	460	445	1209	1033	588	978	1033	1032	1033	1035	458	1035	586	0
E8388	927	940	894	668	248	929	764	796	805	1999	13	818	248	11	10	11	13	794	13	824	1036	0
E8402	843	708	810	229	601	697	801	795	794	1699	734	853	647	734	733	734	734	791	734	853	822	737	0
E8413	308	323	275	717	975	312	49	35	44	1548	784	329	875	784	783	784	784	29	784	325	457	787	784	0
E9000	922	935	889	663	243	924	759	791	800	1994	8	813	243	4	3	4	6	789	6	819	1031	9	732	782	0
H01	289	304	254	724	982	307	42	14	23	1537	791	308	882	791	790	791	791	8	791	304	458	794	791	29	789	0
H02	294	309	259	729	987	312	47	19	28	1542	796	313	887	796	795	796	796	13	796	309	463	799	796	34	794	7	0
S01	294	309	259	729	987	312	47	19	28	1542	796	313	887	796	795	796	796	13	796	309	463	799	796	34	794	7	6	0
S02	296	311	261	731	989	314	49	21	30	1544	798	315	889	798	797	798	798	15	798	311	465	801	798	36	796	9	8	6	0
S03	293	308	258	728	986	311	46	18	27	1541	795	312	886	795	794	795	795	12	795	308	462	798	795	33	793	6	5	3	5	0
S04	292	307	257	727	985	310	45	17	26	1540	794	311	885	794	793	794	794	11	794	307	461	797	794	32	792	5	4	4	6	3	0
S05	291	306	256	726	984	309	44	16	25	1539	793	310	884	793	792	793	793	10	793	306	460	796	793	31	791	4	3	3	5	2	1	0
S06	294	309	259	729	987	312	47	19	28	1542	796	313	887	796	795	796	796	13	796	309	463	799	796	34	794	7	6	4	4	3	4	3	0
S07	336	351	301	773	1031	354	89	61	70	1494	840	355	931	840	839	840	840	55	840	349	507	843	840	78	838	57	62	61	64	61	60	59	62	0
S08	289	304	254	724	982	307	42	14	23	1537	791	308	882	791	790	791	791	8	791	304	458	794	791	29	789	2	7	7	9	6	5	4	7	57	0
S09	293	308	258	728	986	311	46	18	27	1541	795	312	886	795	794	795	795	12	795	308	462	798	795	33	793	6	5	3	5	2	3	2	3	61	6	0
S10	292	307	257	727	985	310	45	17	26	1540	794	311	885	794	793	794	794	11	794	307	461	797	794	32	792	5	4	2	4	1	2	1	2	60	5	1	0
S11	292	307	257	727	985	310	45	17	26	1540	794	311	885	794	793	794	794	11	794	307	461	797	794	32	792	5	4	2	4	1	2	1	2	60	5	1	0	0
S12	294	309	259	729	987	312	47	19	28	1542	796	313	887	796	795	796	796	13	796	309	463	799	796	34	794	7	6	4	6	3	4	3	4	62	7	3	2	2	0
S13	292	307	257	727	985	310	45	17	26	1540	794	311	885	794	793	794	794	11	794	307	461	797	794	32	792	5	4	2	4	1	2	1	2	60	5	1	0	0	2	0
S14	294	309	259	729	987	312	47	19	28	1542	796	313	887	796	795	796	796	13	796	309	463	799	796	34	794	7	6	4	6	3	4	3	4	62	7	3	2	2	4	2	0
S15	292	307	257	727	985	310	45	17	26	1540	794	311	885	794	793	794	794	11	794	307	461	797	794	32	792	5	4	2	4	1	2	1	2	60	5	1	0	0	2	0	2	0
S16	292	307	257	727	985	310	45	17	26	1540	794	311	885	794	793	794	794	11	794	307	461	797	794	32	792	5	4	2	4	1	2	1	2	60	5	1	0	0	2	0	2	0	0
S17	292	307	257	727	985	310	45	17	26	1540	794	311	885	794	793	794	794	11	794	307	461	797	794	32	792	5	4	2	4	1	2	1	2	60	5	1	0	0	2	0	2	0	0	0
S18	294	309	259	729	987	312	47	19	28	1542	796	313	887	796	795	796	796	13	796	309	463	799	796	34	794	7	6	4	6	3	4	3	4	62	7	3	2	2	4	2	4	2	2	2	0
S19	294	309	259	729	987	312	47	19	28	1542	796	313	887	796	795	796	796	13	796	309	463	799	796	34	794	7	6	4	6	3	4	3	4	62	7	3	2	2	4	2	4	2	2	2	0	0
S20	292	307	257	727	985	310	45	17	26	1540	794	311	885	794	793	794	794	11	794	307	461	797	794	32	792	5	4	2	4	1	2	1	2	60	5	1	0	0	2	0	2	0	0	0	2	2	0
SRR631109	1149	1006	1176	1229	928	997	1102	1134	1141	1729	1107	854	1022	1107	1106	1107	1107	1130	1107	860	929	1110	1322	1125	1105	1130	1135	1135	1137	1134	1133	1132	1135	1179	1130	1134	1133	1133	1135	1133	1135	1133	1133	1133	1135	1135	1133	0
SRR631764	1029	888	996	347	207	877	951	959	968	1919	414	687	311	414	413	414	416	957	416	687	1002	417	422	950	412	957	962	962	964	961	960	959	962	1006	957	961	960	960	962	960	962	960	960	960	962	962	960	942	0
SRR631779	964	825	929	916	1185	814	841	841	850	1239	1292	907	1205	1292	1291	1292	1294	839	1294	907	485	1295	1023	842	1290	841	846	846	848	845	844	843	846	888	841	845	844	844	846	844	846	844	844	844	846	846	844	778	1171
SRR633913	1102	961	1071	812	493	950	1009	1019	1026	1701	704	743	599	704	703	704	704	1015	704	743	792	707	885	1012	702	1015	1020	1020	1022	1019	1018	1017	1020	1064	1015	1019	1018	1018	1020	1018	1020	1018	1018	1018	1020	1020	1018	607	487
U01	1068	927	1035	543	59	916	989	999	1006	1940	270	723	167	270	269	270	270	995	270	723	1023	273	616	988	268	995	1000	1000	1002	999	998	997	1000	1044	995	999	998	998	1000	998	1000	998	998	998	1000	1000	998	957	220
U02-1	1441	1338	1416	1483	1636	1335	1412	1406	1397	1747	1823	1394	1646	1823	1822	1823	1825	1404	1825	1392	1107	1825	1576	1413	1821	1406	1411	1411	1413	1410	1409	1408	1411	1453	1406	1410	1409	1409	1411	1409	1411	1409	1409	1409	1411	1411	1409	1222	1642
U02-2	1072	931	1039	764	449	920	951	981	990	1667	638	707	559	638	637	638	640	979	640	707	776	641	837	972	636	979	984	984	986	983	982	981	984	1028	979	983	982	982	984	982	984	982	982	982	984	984	982	653	447
U03	1440	1337	1415	1482	1635	1334	1411	1405	1396	1746	1822	1393	1645	1822	1821	1822	1824	1403	1824	1391	1106	1824	1575	1412	1820	1405	1410	1410	1412	1409	1408	1407	1410	1452	1405	1409	1408	1408	1410	1408	1410	1408	1408	1408	1410	1410	1408	1221	1641
U04	603	448	578	872	1088	437	540	532	517	1398	1111	660	1054	1111	1110	1111	1113	530	1113	658	287	1114	927	537	1109	532	537	537	539	536	535	534	537	579	532	536	535	535	537	535	537	535	535	535	537	537	535	988	1103
U05	1078	939	1053	987	1239	928	980	1006	1013	1515	1364	1038	1253	1364	1363	1364	1366	1004	1366	1038	825	1367	1106	1005	1362	1006	1011	1011	1013	1010	1009	1008	1011	1053	1006	1010	1009	1009	1011	1009	1011	1009	1009	1009	1011	1011	1009	849	1224
U06	1049	908	1016	522	36	897	970	980	987	1917	273	706	178	273	272	273	273	976	273	704	1004	276	595	969	271	976	981	981	983	980	979	978	981	1023	976	980	979	979	981	979	981	979	979	979	981	981	979	944	233
VRE1400294	301	316	266	738	996	319	56	26	35	1549	805	320	896	805	804	805	805	22	805	316	472	808	805	45	803	24	29	29	31	28	27	26	29	71	24	28	27	27	29	27	29	27	27	27	29	29	27	1144	971
Suppl. Table 2. Core-SNP matrix indicating core-SNP differences between each isolate. Boxed are the core-SNP differnces between the Index isolate S01 and all other isolates.
[truncated: 10 more columns]
